# Supplementary material for: Prediction of new ZnS–CaS alloys with anomalous electronic properties
Source: Royal Society of Chemistry journal article supplement (doi:10.1039/c8tc05133j), 2018-12-19
Supplement: c8tc05133j1.pdf [file c8tc05133j1.pdf]

**Supplementary Materials for "Prediction of new ZnS-CaS alloys with anomalous electronic properties"**

Jie Gao,<sup>1</sup> Yifeng Duan,<sup>1, a)</sup> Changming Zhao,<sup>1</sup> Wenjie Liu,<sup>1</sup> Haiming Dong,<sup>1, b)</sup> Dekun Zhang,<sup>2, c)</sup> and Huafeng Dong<sup>3, d)</sup>

<sup>1)</sup>*School of Physics, China University of Mining and Technology, Xuzhou 221116, China.*

<sup>2)</sup>*School of Materials Science and Engineering, China University of Mining and Technology, Xuzhou, 221116, China*

<sup>3)</sup>*School of Physics and Optoelectronic Engineering, Guangdong University of Technology, Guangzhou, 510006, China.*

(Dated: 9 January 2019)

---

<sup>a)</sup>Electronic mail: yifeng@cumt.edu.cn

<sup>b)</sup>Electronic mail: hmdong@cumt.edu.cn

<sup>c)</sup>Electronic mail: dkzhang@cumt.edu.cn

<sup>d)</sup>Electronic mail: hfdong@gdut.edu.cn

TABLE S1. Bulk modulus B (GPa), shear modulus G (GPa), Young's modulus E (GPa), Poisson's ratio  $\nu$  and Vickers hardness  $H_v$  (GPa) for possible ZnS, CaS and ZnS-CaS alloys at ambient pressure.

| Phase                                                              | B  | G  | E   | $\nu$ | $H_v$ |
|--------------------------------------------------------------------|----|----|-----|-------|-------|
| <i>ZB</i> -ZnS                                                     | 70 | 34 | 87  | 0.293 | 3.62  |
| <i>RS</i> -ZnS                                                     | 86 | 46 | 117 | 0.274 | 5.95  |
| <i>Cmcm</i> -ZnS                                                   | 87 | 46 | 118 | 0.274 | 5.98  |
| <i>RS</i> -CaS                                                     | 56 | 40 | 96  | 0.216 | 8.33  |
| <i>Pm</i> $\bar{3}m$ -CaS                                          | 62 | 18 | 50  | 0.365 | -0.35 |
| <i>I4/mcm</i> -CaZnS <sub>2</sub>                                  | 60 | 32 | 82  | 0.273 | 4.30  |
| <i>R</i> $\bar{3}$ -Ca <sub>2</sub> ZnS <sub>3</sub>               | 51 | 20 | 52  | 0.329 | 0.75  |
| <i>R</i> $\bar{3}$ -Ca <sub>7</sub> Zn <sub>2</sub> S <sub>9</sub> | 40 | 18 | 48  | 0.303 | 1.34  |



Fig. S1. Formation enthalpy of ZnS-CaS alloys with respect to decomposition into (a) ZnS and CaS, (b)  $\text{CaZnS}_2$  and CaS, and (c)  $\text{Ca}_2\text{ZnS}_3$  and CaS, where the stable phases with the lowest energy are chosen for special pressures.



Fig. S2. The phonon spectrums of predicted (a)  $I4/mcm$ - $\text{CaZnS}_2$ , (b)  $R\bar{3}$ - $\text{Ca}_2\text{ZnS}_3$  and (c)  $R\bar{3}$ - $\text{Ca}_7\text{Zn}_2\text{S}_9$  at 0 GPa.



Fig. S3. The upper panels show the crystal structures of the predicted thermodynamically metastable ZnS-CaS alloys at special pressures, whose phonon spectrums are listed correspondingly in the bottom panels.

TABLE S2. Structural parameters and atomic coordinates for metastable ZnS-CaS alloys at different pressures.

|                                                | Structure    | Parameters( $\text{\AA},^\circ$ )                                                 | Atom   | x    | y    | z    | P(GPa) |
|------------------------------------------------|--------------|-----------------------------------------------------------------------------------|--------|------|------|------|--------|
| CaZn <sub>3</sub> S <sub>4</sub>               | <i>P421c</i> | a=b=5.62<br>c=6.02<br>$\alpha = \beta = \gamma=90$                                | Ca(2b) | 0.00 | 0.00 | 0.50 | 70     |
|                                                |              |                                                                                   | Zn(4d) | 0.00 | 0.50 | 0.04 |        |
|                                                |              |                                                                                   | Zn(2a) | 0.00 | 0.00 | 0.00 |        |
|                                                |              |                                                                                   | S(8e)  | 0.25 | 0.20 | 0.19 |        |
| CaZn <sub>2</sub> S <sub>3</sub>               | <i>C2</i>    | a=8.45<br>b=5.85<br>c=17.38<br>$\alpha = \gamma=90$<br>$\beta=133.49$             | Ca(4c) | 1.00 | 0.26 | 0.67 | 50     |
|                                                |              |                                                                                   | Ca(2b) | 0.00 | 0.28 | 0.50 |        |
|                                                |              |                                                                                   | Ca(2a) | 0.00 | 0.82 | 0.00 |        |
|                                                |              |                                                                                   | Zn(4c) | 0.00 | 0.76 | 0.67 |        |
|                                                |              |                                                                                   | Zn(4c) | 0.52 | 0.29 | 0.85 |        |
|                                                |              |                                                                                   | Zn(4c) | 0.04 | 0.29 | 0.19 |        |
|                                                |              |                                                                                   | Zn(2a) | 0.00 | 0.31 | 0.00 |        |
|                                                |              |                                                                                   | Zn(2b) | 0.50 | 0.26 | 0.50 |        |
|                                                |              |                                                                                   | S(4c)  | 0.19 | 0.97 | 0.64 |        |
|                                                |              |                                                                                   | S(4c)  | 0.32 | 0.04 | 0.85 |        |
|                                                |              |                                                                                   | S(4c)  | 0.69 | 0.04 | 0.82 |        |
|                                                |              |                                                                                   | S(4c)  | 0.81 | 0.97 | 0.69 |        |
| Ca <sub>3</sub> Zn <sub>2</sub> S <sub>5</sub> | <i>P1</i>    | a=11.47<br>b=5.32<br>c=5.34<br>$\alpha=107.80$<br>$\beta=99.34$<br>$\gamma=78.00$ | Ca(2i) | 0.29 | 0.52 | 0.41 | 30     |
|                                                |              |                                                                                   | Ca(2i) | 0.52 | 0.77 | 0.25 |        |
|                                                |              |                                                                                   | Ca(2i) | 0.09 | 0.85 | 0.14 |        |
|                                                |              |                                                                                   | Zn(2i) | 0.90 | 0.66 | 0.36 |        |
|                                                |              |                                                                                   | Zn(2i) | 0.30 | 0.01 | 0.92 |        |
|                                                |              |                                                                                   | S(2i)  | 0.31 | 0.00 | 0.34 |        |
|                                                |              |                                                                                   | S(2i)  | 0.07 | 0.38 | 0.22 |        |
|                                                |              |                                                                                   | S(2i)  | 0.88 | 0.08 | 0.33 |        |
|                                                |              |                                                                                   | S(2i)  | 0.53 | 0.26 | 0.25 |        |
| Ca <sub>5</sub> Zn <sub>3</sub> S <sub>8</sub> | <i>Amm2</i>  | a=8.95<br>b=8.82<br>c=6.11<br>$\alpha = \beta = \gamma=90$                        | Ca(8f) | 0.26 | 0.75 | 0.57 | 30     |
|                                                |              |                                                                                   | Ca(2a) | 0.00 | 0.50 | 0.55 |        |
|                                                |              |                                                                                   | Zn(2a) | 0.00 | 0.00 | 0.55 |        |
|                                                |              |                                                                                   | Zn(2b) | 0.50 | 0.00 | 0.08 |        |
|                                                |              |                                                                                   | Zn(2b) | 0.50 | 0.00 | 0.57 |        |
|                                                |              |                                                                                   | S(4c)  | 0.69 | 0.00 | 0.83 |        |
|                                                |              |                                                                                   | S(4c)  | 0.21 | 0.00 | 0.33 |        |
|                                                |              |                                                                                   | S(4d)  | 0.00 | 0.21 | 0.76 |        |
| Ca <sub>3</sub> ZnS <sub>4</sub>               | <i>I43m</i>  | a=b=c=6.27<br>$\alpha = \beta = \gamma=90$                                        | Ca(6b) | 0.50 | 0.00 | 0.00 | 30     |
|                                                |              |                                                                                   | Zn(8c) | 0.00 | 0.00 | 0.00 |        |
|                                                |              |                                                                                   | S(2a)  | 0.71 | 0.29 | 0.29 |        |

TABLE S3. Elastic constants tensors of predicted ZnS-CaS alloys.

| Phase                                         | Elastic constant tensor $C_{ij}$ (GPa)                                                                                                                                |
|-----------------------------------------------|-----------------------------------------------------------------------------------------------------------------------------------------------------------------------|
| $I4/mcm\text{-CaZnS}_2$                       | $\begin{pmatrix} 99 & 56 & 17 & 0 & 0 & 0 \\ & 99 & 17 & 0 & 0 & 0 \\ & & 162 & 0 & 0 & 0 \\ & & & 26 & 0 & 0 \\ & & & & 26 & 0 \\ & & & & & 31 \end{pmatrix}$        |
| $R\bar{3}\text{-Ca}_2\text{ZnS}_3$            | $\begin{pmatrix} 72 & 42 & 32 & -3 & -6 & 0 \\ & 72 & 32 & 3 & 6 & 0 \\ & & 97 & 0 & 0 & 0 \\ & & & 23 & 0 & 6 \\ & & & & 23 & -3 \\ & & & & & 15 \end{pmatrix}$      |
| $R\bar{3}\text{-Ca}_7\text{Zn}_2\text{S}_9$   | $\begin{pmatrix} 68 & 39 & 21 & -5 & 2 & 0 \\ & 68 & 21 & 5 & -2 & 0 \\ & & 66 & 0 & 0 & 0 \\ & & & 21 & 0 & -2 \\ & & & & 21 & -5 \\ & & & & & 14 \end{pmatrix}$     |
| $C2\text{-CaZn}_2\text{S}_3$                  | $\begin{pmatrix} 43 & 24 & 28 & 0 & -15 & 0 \\ & 91 & 36 & 0 & -4 & 0 \\ & & 88 & 0 & -22 & 0 \\ & & & 9 & 0 & 4 \\ & & & & 33 & 0 \\ & & & & & 8 \end{pmatrix}$      |
| $Am\bar{m}2\text{-Ca}_5\text{Zn}_3\text{S}_8$ | $\begin{pmatrix} 92 & 45 & 7 & 0 & 0 & 0 \\ & 82 & 23 & 0 & 0 & 0 \\ & & 141 & 0 & 0 & 0 \\ & & & 16 & 0 & 0 \\ & & & & -15 & 0 \\ & & & & & 10 \end{pmatrix}$        |
| $P\bar{1}\text{-Ca}_3\text{Zn}_2\text{S}_5$   | $\begin{pmatrix} 83 & 31 & 31 & 3 & 9 & 1 \\ & 86 & 44 & -5 & 9 & -2 \\ & & 78 & 5 & -2 & -8 \\ & & & 30 & -20 & 17 \\ & & & & 17 & -7 \\ & & & & & 35 \end{pmatrix}$ |
| $P421c\text{-CaZn}_3\text{S}_4$               | $\begin{pmatrix} 114 & 30 & 33 & 0 & 0 & 0 \\ & 114 & 33 & 0 & 0 & 0 \\ & & 98 & 0 & 0 & 0 \\ & & & -13 & 0 & 0 \\ & & & & -13 & 0 \\ & & & & & -2 \end{pmatrix}$     |
| $I\bar{4}3m\text{-Ca}_3\text{ZnS}_4$          | $\begin{pmatrix} 121 & 22 & 22 & 0 & 0 & 0 \\ & 121 & 22 & 0 & 0 & 0 \\ & & 121 & 0 & 0 & 0 \\ & & & -11 & 0 & 0 \\ & & & & -11 & 0 \\ & & & & & -11 \end{pmatrix}$   |



Fig. S4. Full DOS of ZnS, CaS and their alloys at different pressures based on TB-mBJ functional. ZnS-CaS alloys: (a)  $I4/mcm$ -CaZnS<sub>2</sub> at 20 GPa, (b)  $R\bar{3}$ -Ca<sub>2</sub>ZnS<sub>3</sub> at 30 GPa, (c)  $R\bar{3}$ -Ca<sub>7</sub>Zn<sub>2</sub>S<sub>9</sub> at 40 GPa; ZnS: (d)  $ZB$  at 0 GPa, (e)  $RS$  at 20 GPa, (f)  $Cmcm$  at 70 GPa; and CaS: (g)  $RS$  at 0 GPa, (h)  $Pm\bar{3}m$  at 40 GPa, (i)  $Pm\bar{3}m$  at 90 GPa. The VBM is set to zero in each panel.



Fig. S5. Band structures and DOS of ZnS-CaS alloys based on TB-mBJ functional.



Fig. S6. Projected DOS above the Fermi level of stable ZnS-CaS alloys based on TB-mBJ functional.
